# Supplementary material for: Lithium-ion battery performance enhanced by the combination of Si thin flake anodes and binary ionic liquid systems
Source: Royal Society of Chemistry journal article supplement (doi:10.1039/d0ma00296h), 2020-01-01
Supplement: d0ma00296h1.pdf [file d0ma00296h1.pdf]

Electronic Supplementary Information

**Lithium-Ion Battery Performance Enhanced by Combination of Si Thin Flake Anode and Binary Ionic Liquid System**

Kei Hosoya,<sup>a</sup> Toshiki Kamidaira,<sup>a</sup> Tetsuya Tsuda,<sup>\*a</sup> Akihito Imanishi,<sup>b</sup>  
Masakazu Haruta,<sup>c</sup> Takayuki Doi,<sup>c</sup> Minoru Inaba,<sup>c</sup> and Susumu Kuwabata<sup>\*a</sup>

<sup>a</sup>*Department of Applied Chemistry, Graduate School of Engineering, Osaka University,  
2-1 Yamada-oka, Suita, Osaka 565-0871, Japan  
E-mail: kuwabata@chem.eng.osaka-u.ac.jp; ttsuda@chem.eng.osaka-u.ac.jp*

<sup>b</sup>*Department of Chemistry, Graduate School of Engineering Science, Osaka University,  
1-3 Machikaneyama, Toyonaka, Osaka 560-8531, Japan*

<sup>c</sup>*Department of Molecular Chemistry and Biochemistry, Doshisha University,  
1-3 Tatara Miyakodani, Kyotanabe, Kyoto 610-0321, Japan*

**Supplementary Information Contents:**

|                              |      |
|------------------------------|------|
| Figure S1                    | p. 2 |
| Table S1-S3                  | p. 3 |
| Captions for Movie S1 and S2 | p. 6 |
| References                   | p. 7 |

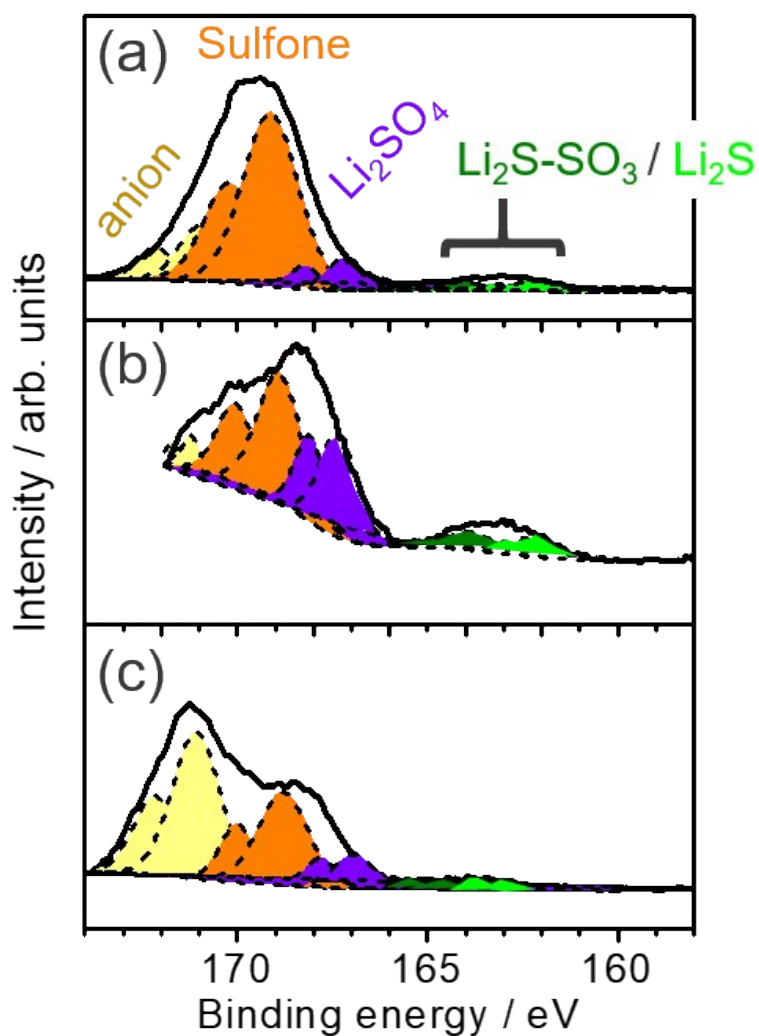

**Fig. S1** XPS spectra for S-2p of the Si thin flake composite anodes after five charge-discharge cycles. The charge-discharge test was conducted by a CC mode at 0.5 C, and the cut-off voltages were  $-3.88$  V and  $-2.40$  V (vs.  $\text{LiCoO}_2$ ). The electrolytes were (a) 83.3–16.7 mol%  $[\text{C}_2\text{mim}][\text{FSA}]\text{-Li}[\text{TFSA}]$ , (b) 83.3–16.7 mol%  $[\text{C}_2\text{mim}][\text{FSA}]\text{-Li}[\text{FSA}]$ , and (c) 50.0–50.0 mol%  $[\text{C}_2\text{mim}][\text{FSA}]\text{-Li}[\text{FSA}]$ .

**Table S1** Densities of the IL electrolytes employed in this study at 298 K

| IL electrolytes                                   | $d / \text{g cm}^{-3}$ |
|---------------------------------------------------|------------------------|
| 83.3–16.7 mol% [C <sub>2</sub> mim][FSA]–Li[TFSA] | 1.51                   |
| 83.3–16.7 mol% [C <sub>2</sub> mim][FSA]–Li[FSA]  | 1.49                   |
| 50.0–50.0 mol% [C <sub>2</sub> mim][FSA]–Li[FSA]  | 1.62                   |

**Table S2** Chemical species contained in the SEI films formed in different IL electrolytes and their composition ratios

| IL electrolytes                                      | Composition ratio / at% |                   |                   |                                 |                    |
|------------------------------------------------------|-------------------------|-------------------|-------------------|---------------------------------|--------------------|
|                                                      | LiF                     | Li <sub>3</sub> N | Li <sub>2</sub> S | Li <sub>2</sub> SO <sub>4</sub> | -SO <sub>2</sub> R |
| 83.3–16.7 mol%<br>[C <sub>2</sub> mim][FSA]–Li[TFSA] | 20.6                    | 2.0               | 4.8               | 23.0                            | 49.5               |
| 83.3–16.7 mol%<br>[C <sub>2</sub> mim][FSA]–Li[FSA]  | 63.3                    | 0.9               | 5.8               | 18.8                            | 11.3               |
| 50.0–50.0 mol%<br>[C <sub>2</sub> mim][FSA]–Li[FSA]  | 45.8                    | 2.9               | 3.8               | 27.9                            | 19.7               |

**Table S3** Summary of Li-ion conductivities and shear modulus for potential SEI components

|                                                  | Li ion conductivity<br>$\sigma / \text{S cm}^{-1}$ | Shear modulus<br>G / GPa |
|--------------------------------------------------|----------------------------------------------------|--------------------------|
| LiF <sup>S1,S2</sup>                             | $6 \times 10^{-6}$ (323 K)                         | 55                       |
| Li <sub>3</sub> N <sup>S3,S4</sup>               | $1 \times 10^{-3}$ (300 K)                         | 64                       |
| Li <sub>2</sub> SO <sub>4</sub> <sup>S5,S6</sup> | $5 \times 10^{-8}$ (298 K)                         | 20                       |
| Li <sub>2</sub> S <sup>S7-S9</sup>               | $> 10^{-11}$ (298 K)                               | 32~35                    |
| LiPON <sup>S10</sup>                             | $2 \times 10^{-6}$ (298 K)                         | 31                       |

## Captions for Movie S1 and S2

**Movie S1** Video clip of a binder free Si thin flake anode in the *operando* SEM observation cell with a 83.3–16.7 mol% [C<sub>2</sub>mim][FSA]–Li[TFSA] IL electrolyte during the fourth charge process. The charge process was conducted in a CC/CV mode with cut-off voltages ranging between –3.88 V and –2.40 V (vs. LiCoO<sub>2</sub>). The CC rates for charge and discharge were 1/2 C. The cut-off current density was 1/20 C. The video clip plays at 700 × speed.

**Movie S2** Video clip of a binder free Si thin flake anode in the *operando* SEM observation cell with a 83.3–16.7 mol% [C<sub>2</sub>mim][FSA]–Li[FSA] IL electrolyte during the fourth charge process. The charge process was conducted in a CC/CV mode with cut-off voltages ranging between –3.88 V and –2.40 V (vs. LiCoO<sub>2</sub>). The CC rates for charge and discharge were 1/2 C. The cut-off current density was 1/20 C. The video clip plays at 700 × speed.

## References

- S1 C. Li, L. Gu and J. Maier, *Adv. Funct. Mater.*, 2012, **22**, 1145-1149.
- S2 J. Qian, W. Xu, P. Bhattacharya, M. Engelhard, W. A. Henderson, Y. Zhang and J.-G. Zhang, *Nano Energy*, 2015, **15**, 135-144.
- S3 U. v. Alpen, A. Rabenau and G. H. Talat, *Appl. Phys. Lett.*, 1977, **30**, 621-623.
- S4 W. Li, J.-f. Chen and T. Wang, *Physica B*, 2010, **405**, 400-403.
- S5 N. Kuwata, N. Iwagami and J. Kawamura, *Solid State Ionics*, 2009, **180**, 644-648.
- S6 K. T. Schutt, H. E. Saucedo, P. J. Kindermans, A. Tkatchenko and K. R. Muller, *J. Chem. Phys.*, 2018, **148**, 241722.
- S7 H. Khachai, R. Khenata, A. Bouhemadou, A. H. Reshak, A. Haddou, M. Rabah and B. Soudini, *Solid State Commun.*, 2008, **147**, 178-182.
- S8 Z. Lin, Z. Liu, N. J. Dudney and C. Liang, *ACS Nano*, 2013, **7**, 2829-2833.
- S9 S. Lorger, D. Fischer, R. Usiskin and J. Maier, *J. Vac. Sci. Technol., A*, 2019, **37**, 061515.
- S10 X. H. Yu, J. B. Bates, G. E. Jellison and F. X. Hart, *J. Electrochem. Soc.*, 1997, **144**, 524-532.
